# Supplementary material for: Single-cell transcriptome analysis demonstrates inter-patient and intra-tumor heterogeneity in primary and metastatic lung adenocarcinoma
Source: publisher site journal article supplement (doi:10.18632/aging.103945), 2020-11-07
Supplement: Supplementary file [file aging-v12i21-103945-supplementary-material-SD2.pdf]

**Supplementary Table 1. Comparison methods between primary tumours and brain metastases.**

| <b>Lung adenocarcinoma</b>  |                 | <b>Normal</b> | <b>Primary tumour</b>                                       | <b>Brain metastasis</b>                | <b>Brain metastasis with chemotherapy</b> |
|-----------------------------|-----------------|---------------|-------------------------------------------------------------|----------------------------------------|-------------------------------------------|
| <b>chemotherapy</b>         |                 | <b>No</b>     | <b>No</b>                                                   | <b>No</b>                              | <b>Yes</b>                                |
| Intertumoural heterogeneity | DEGs            |               | Enrichment analysis (BP, CC, MF, KEGG)<br>Survival analysis |                                        |                                           |
|                             | GSEA (Table S3) | Control group | Angiogenesis etc.                                           | Epithelial mesenchymal transition etc. | Oxidative phosphorylation etc.            |
| Intratumoural heterogeneity | DEGs            | None          | Enrichment analysis in subgroups                            |                                        |                                           |
|                             | GSEA            | None          | Gene sets analysis in subgroups                             |                                        |                                           |
|                             | Monocle         | None          | Single cell trajectories between subgroups                  |                                        |                                           |
